# Supplementary material for: Challenges in Collating Spirometry Reference Data for South-Asian Children: An Observational Study
Source: PLOS journal article supplement (doi:10.1371/journal.pone.0154336), 2016-04-27
Supplement: S11 (10.1371/journal.pone.0154336.s011) [file journal.pone.0154336.s011]

**S4 Table. Lung function results based on Model 1 GLI-coefficients derived from Centre B (Delhi)**

| Centre | n   | zFEV <sub>1</sub> | zFVC        | zFEV <sub>1</sub> /FVC | % ≤LLN zFEV <sub>1</sub> | % ≤LLN zFVC | % ≤LLN zFEV <sub>1</sub> /FVC |
|--------|-----|-------------------|-------------|------------------------|--------------------------|-------------|-------------------------------|
| B      | 670 | 0.02 (0.86)       | 0.02 (0.89) | 0.09 (1.06)            | 2.1%                     | 2.2%        | 4.2%                          |

Data presented as Mean (SD) unless otherwise specified. Abbreviations: LLN: Lower limit of normal (equates to  $\leq -1.645$  z-scores)
