# Supplementary material for: Challenges in Collating Spirometry Reference Data for South-Asian Children: An Observational Study
Source: PLOS journal article supplement (doi:10.1371/journal.pone.0154336), 2016-04-27
Supplement: S15 (10.1371/journal.pone.0154336.s015) [file journal.pone.0154336.s015]

**S8 Table. Data required for prospective data collection**

| <b>Study information</b>                | <b>Essential details</b>                                                                                                                                                                                                                              |
|-----------------------------------------|-------------------------------------------------------------------------------------------------------------------------------------------------------------------------------------------------------------------------------------------------------|
| Measures of ethnicity                   | Ethnic origin of parents and grandparents; place of birth of three generations; genetic ancestry; main language spoken                                                                                                                                |
| Birth details                           | Date of birth, birth weight and gestation where feasible                                                                                                                                                                                              |
| Medical history                         | Chronic or current medical conditions; current symptoms                                                                                                                                                                                               |
| Socio-economic circumstances (SEC)      | Measures that have local and international currency at individual (e.g. maternal education) and area level (area deprivation). Preferably several measures of SEC.                                                                                    |
| Environmental exposures                 | Tobacco smoke exposure, maternal and household; outdoor and indoor air pollution                                                                                                                                                                      |
| Standardised anthropometric assessments | Standing and sitting height, weight                                                                                                                                                                                                                   |
| Lung function assessments               | Performed according to ATS/ERS guidelines using equipment that allows prospective quality control at time of data collection, storage of all data for subsequent independent over-read and automated export of results to avoid transcription errors. |
| Recording of age and height             | To one decimal place (in years, cm)                                                                                                                                                                                                                   |
